# Supplementary material for: Two‐step nuclear centring by competing microtubule‐ and actin‐based mechanisms in 2‐cell mouse embryos
Source: PubMed Central journal article supplement — EMBO Rep. 2022 Oct 10;23(11):e55251. doi: 10.15252/embr.202255251 (PMC9638869; doi:10.15252/embr.202255251), 2022-10-10
Supplement: EMBR-23-e55251-s006.pdf [file EMBR-23-e55251-s006.pdf]

Appendix for

## **Two-step nuclear centring by competing microtubule- and actin-based mechanisms in 2-cell mouse embryos**

Yunan Ye, Hayden A. Homer

This PDF file includes:

|                          |   |
|--------------------------|---|
| Appendix figures S1..... | 1 |
| Appendix figures S2..... | 3 |
| Appendix figures S3..... | 4 |
| Appendix figures S4..... | 5 |

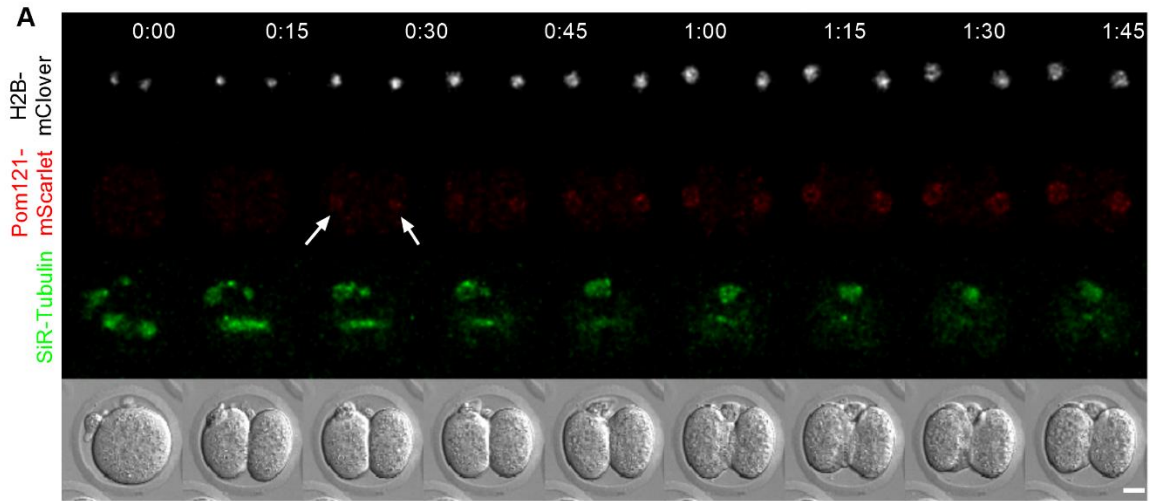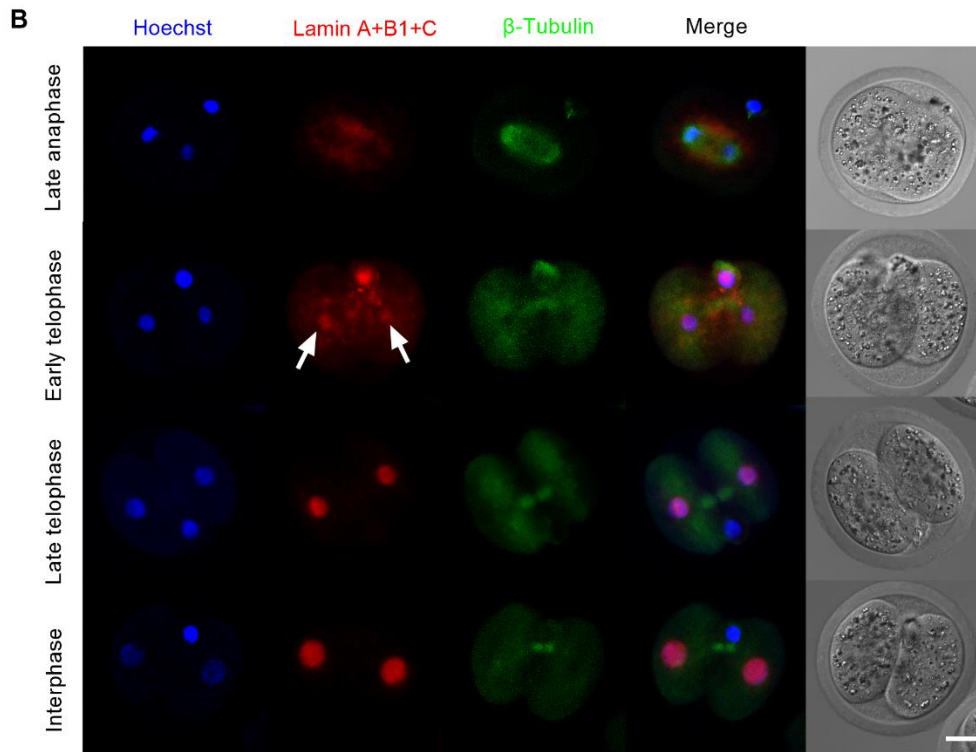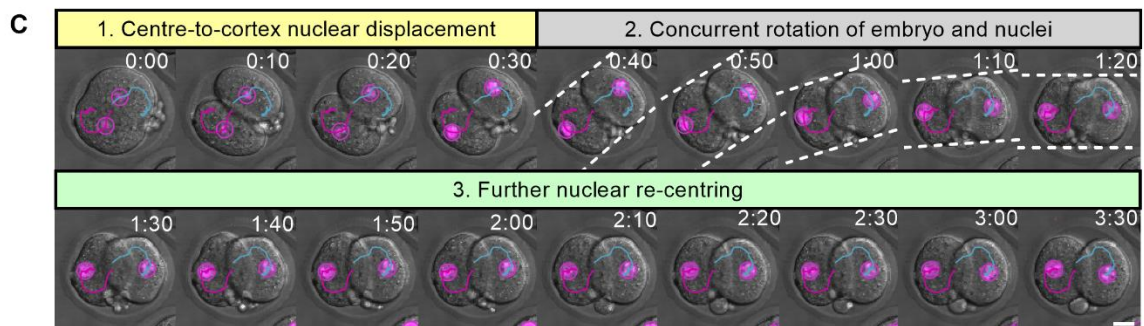

## **Appendix Figure S1.**

**A** Time-lapse images of an embryo expressing a fluorescently labelled nuclear pore complex protein, Pom121-mScarlet, and H2B-mClover with tubulin labelled using SiR-tubulin. White arrows indicate when Pom121-mScarlet first shows clear co-localisation with DNA (n = 20 embryos). Time is shown as h:min post-anaphase onset.

**B** Shown are representative images of embryos immunostained for lamin A+B1+C,  $\beta$ -tubulin and Hoechst at the cell-cycle stages shown. White arrows indicate the first appearance of lamin signals co-localising with decondensed DNA (n > 3 embryos each time point).

**C** Example of concurrent rotation of embryo and nuclei during nuclear re-centring. Time is shown as h:min post-anaphase onset.

**Data information:** In (A – C), scale bar = 20  $\mu$ m.

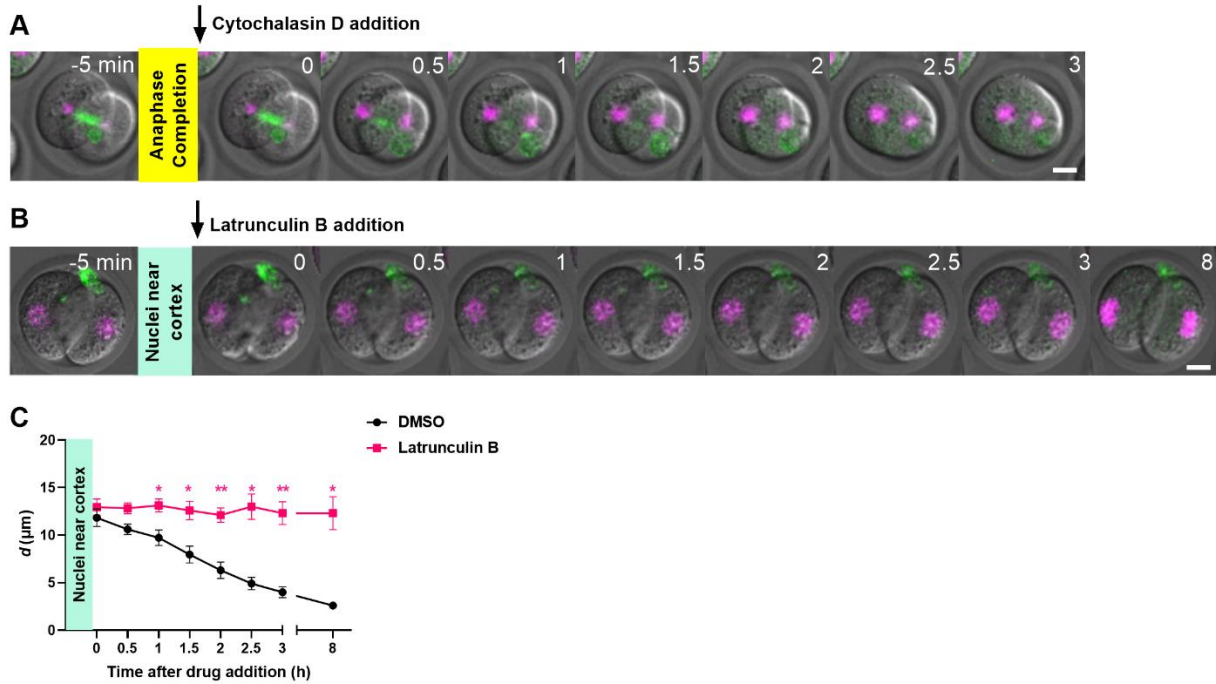

## Appendix Figure S2.

**A** Representative time-lapse images of embryos expressing H2B-RFP and labelled with SiR-tubulin following cytochalasin D addition after cytokinesis completion ( $n = 11$  embryos).

**B, C** Representative time-lapse images (**B**) and quantification (**C**) of embryos following treatment with Latrunculin B after nuclei reached the cortex ( $n = 5$  blastomeres, mean  $\pm$  SEM).

**Data information:** Scale bar = 20  $\mu\text{m}$ . In (**A**, **B**), time is shown as h post-drug addition. Statistical significance was assessed by Mann-Whitney test, ( $*P < 0.05$ ,  $**P < 0.01$ , unremarked datapoints = not significant).

**A** Cytochalasin D washout

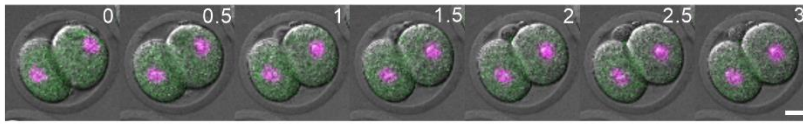

**C** Cytochalasin D washout

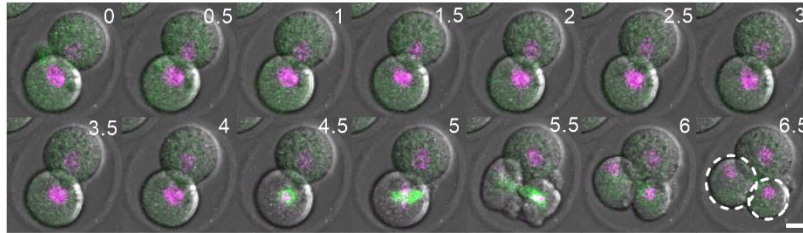

**B**

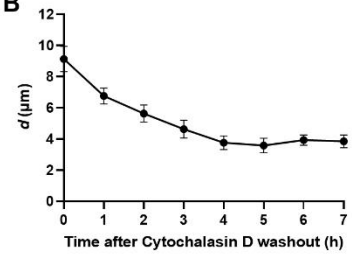

### Appendix Figure S3

**A** Representative time-lapse images of embryos whose nuclei had been trapped at the cortex by cytochalasin D following drug washout.

**B** Changes in nucleus-to-cell centre distances ( $d$ ) over time following cytochalasin D washout ( $n = 22$  blastomeres).

**C** An example of asymmetric division that occurred before nuclei were centred following cytochalasin D washout. Time is shown as h post-drug washout.

**Data information:** In (A, C), time is shown as h post-drug washout and scale bar = 20  $\mu\text{m}$ . In (B), data are shown as mean  $\pm$  SEM.

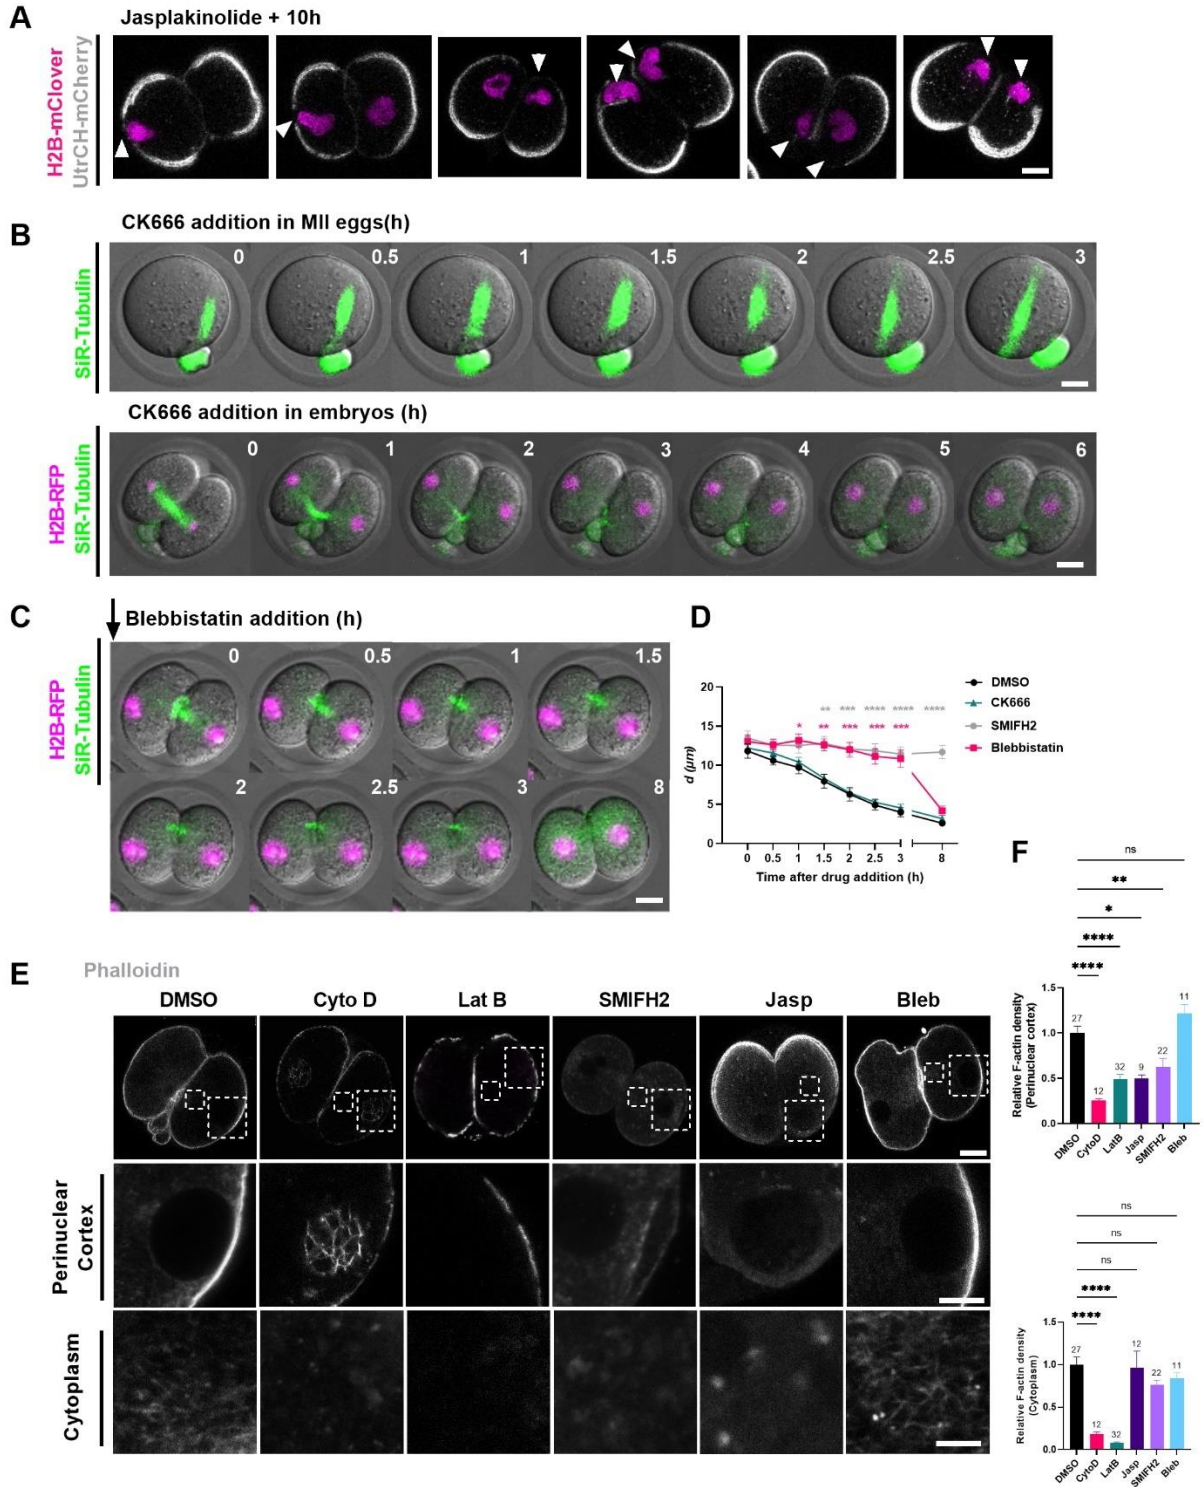

## Appendix Figure S4

**A** Effect of Jasplakinolide on actin and nuclei 10h post-drug addition. Arrowheads indicate F-actin-deprived actin cortex near displaced nuclei.

**B** Representative time-lapse images of meiosis II-arrested oocytes (top,  $n = 7$  oocytes) and 2-cell embryos (bottom,  $n = 16$  blastomeres) labelled with SiR-tubulin in the presence of CK666.

**C** Representative time-lapse images of 2-cell embryos expressing H2B-RFP and labelled with SiR-Tubulin following treatment with blebbistatin when the nuclei are near the cortex.

**D** Changes in nucleus-to-cell centre distances ( $d$ ) over time relative to time of drug addition in DMSO- ( $n = 20$  blastomeres), SMIFH2 ( $n = 9$  blastomeres), and CK666- ( $n = 16$  blastomeres), and blebbistatin ( $n = 12$  blastomeres) treated 2-cell blastomeres. Time is shown as h post-drug addition.

**E** Shown are representative images of embryos immunostained for phalloidin. DMSO-treated embryos were cultured in DMSO from pronucleus-stage and fixed when nuclei were near the cortex. In the treatment groups, drugs were added when nuclei reached the cortex and embryos were fixed 3-10 h later. Enlarged images of large and small dashed boxes are shown as “Perinuclear cortex” and “Cytoplasm” panels, respectively.

**F** Bar charts of relative F-actin densities in cytoplasmic and perinuclear cortex regions normalised to respective mean intensities measured from DMSO-control embryos. The number of blastomeres measured is shown above individual bars.

**Data information:** In (A - C), scale bar = 20  $\mu\text{m}$ . In (E), scale bar = 20  $\mu\text{m}$  (top panel), 10  $\mu\text{m}$  (middle panel), 5  $\mu\text{m}$  (lower panel). In (B - C), time is shown as h post-drug addition. In (D, F), data are shown as mean  $\pm$  SEM. Statistical significance was assessed by an ordinary two-way ANOVA with Šidák’s multiple comparisons test (D) or Statis Kruskal-Wallis test (F) (\* $P < 0.05$ , \*\* $P < 0.01$ , \*\*\*\* $P < 0.0001$ , unremarked datapoints = not significant).
